# Supplementary material for: Extract-mediated synthesis of Ag@AgCl nanoparticles using Conium maculatum seeds: characterization, antibacterial activity and cytotoxicity effect against MCF-7 cell line
Source: Royal Society of Chemistry journal article supplement (doi:10.1039/c6ra16127h), 2016-01-01
Supplement: c6ra16127h1.pdf [file c6ra16127h1.pdf]

## Extract-mediated synthesis of Ag@AgCl nanoparticles using *Conium maculatum* seeds: characterization, antibacterial activity and cytotoxicity effect against MCF-7 cell line

Hossein Alishah, Shahram Pourseyedi, Saeed Esmaili Mahani, S. Yousef Ebrahimipour

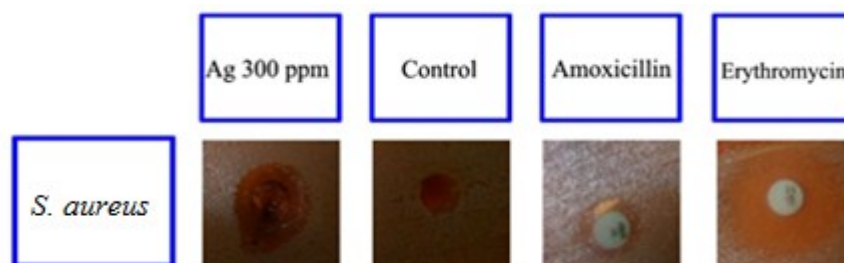

**Fig. S1.** Antibacterial activity of biosynthesized Ag@AgCl-NPs against *S. aureus*

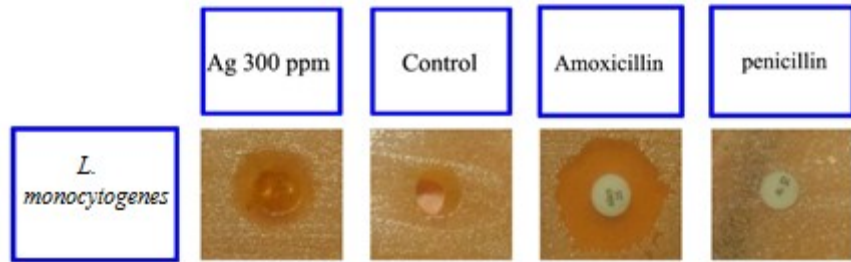

**Fig.S2.** Antibacterial activity of biosynthesized Ag@AgCl-NPs against *L. monocytogenes*

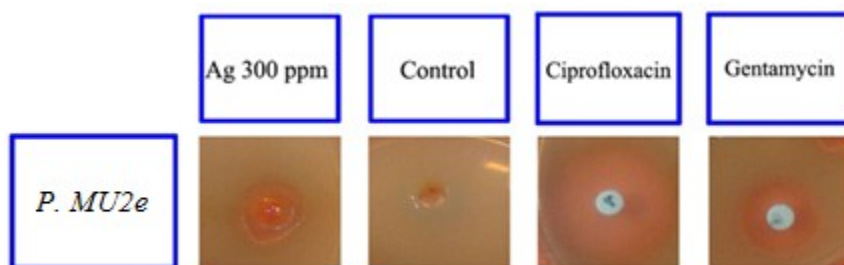

**Fig. S3.** Antibacterial activity of biosynthesized Ag@AgCl-NPs *Pseudomonas*-MU2e

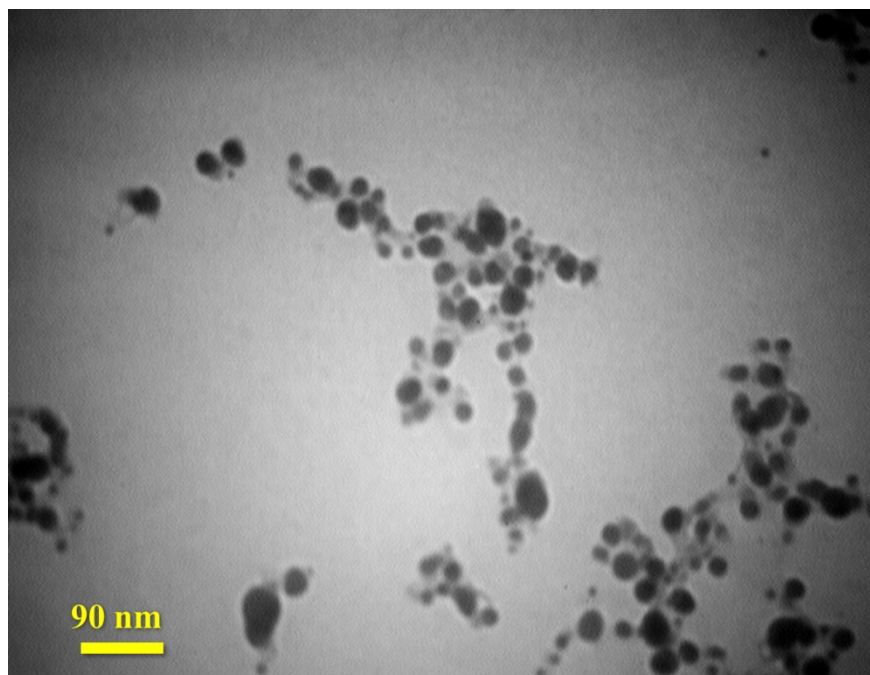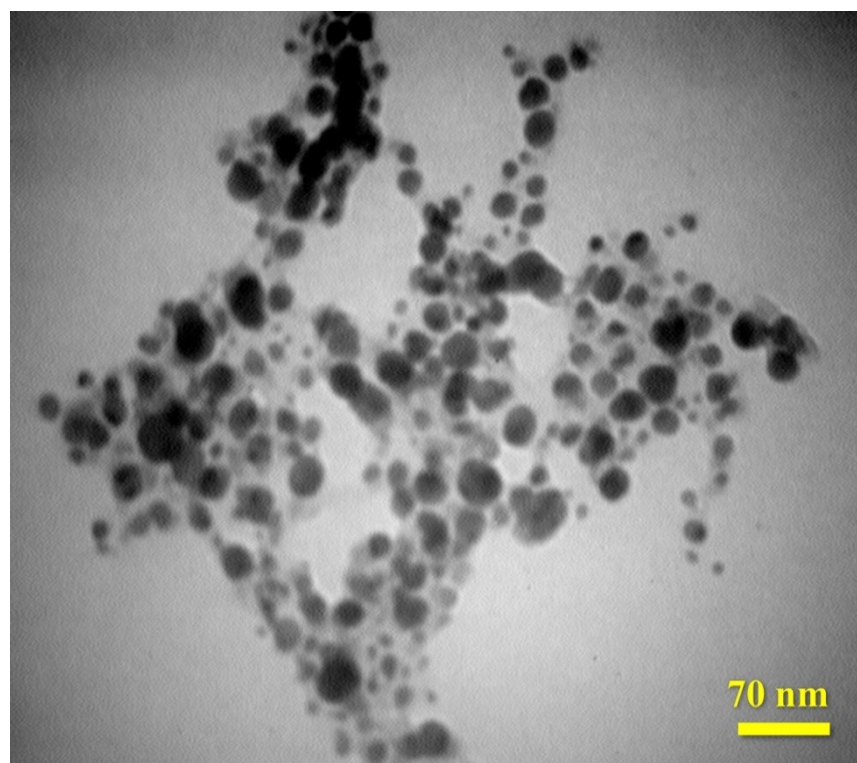

Fig. S4. TEM images of Ag@AgCl nanoparticles produced by the seed extract of *Conium maculatum*
